# Supplementary material for: Stable intronic sequence RNAs have possible regulatory roles in Drosophila melanogaster
Source: PubMed Central journal article supplement — J Cell Biol. 2015 Oct 26;211(2):243–51. doi: 10.1083/jcb.201507065 (PMC4621838; doi:10.1083/jcb.201507065), 2015-10-26
Supplement: supp_jcb.201507065_JCB_201507065_sm.pdf [file supp_jcb.201507065_JCB_201507065_sm.pdf]

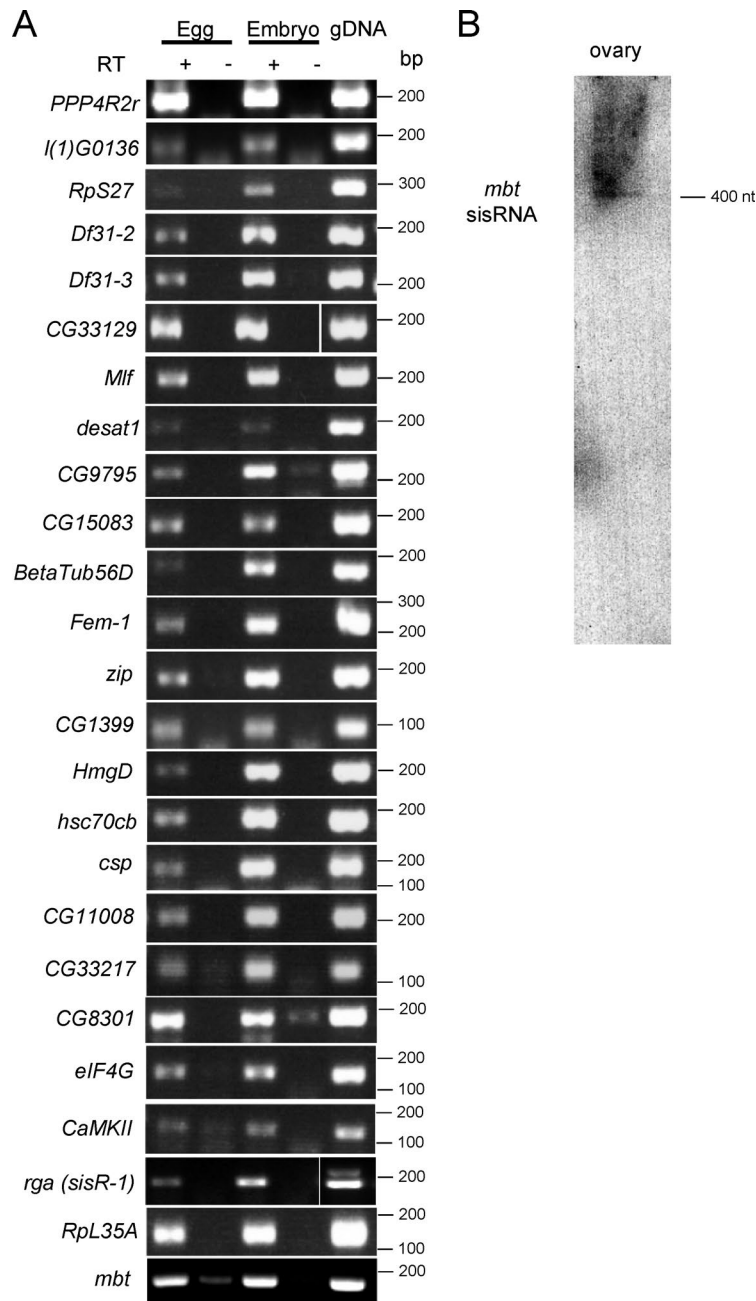

Figure S1. **Identification of sisRNAs.** (A) RT-PCR showing expression of sisRNAs in unfertilized eggs. (B) Northern blot showing the expression of *mbt* sisRNA in ovaries.

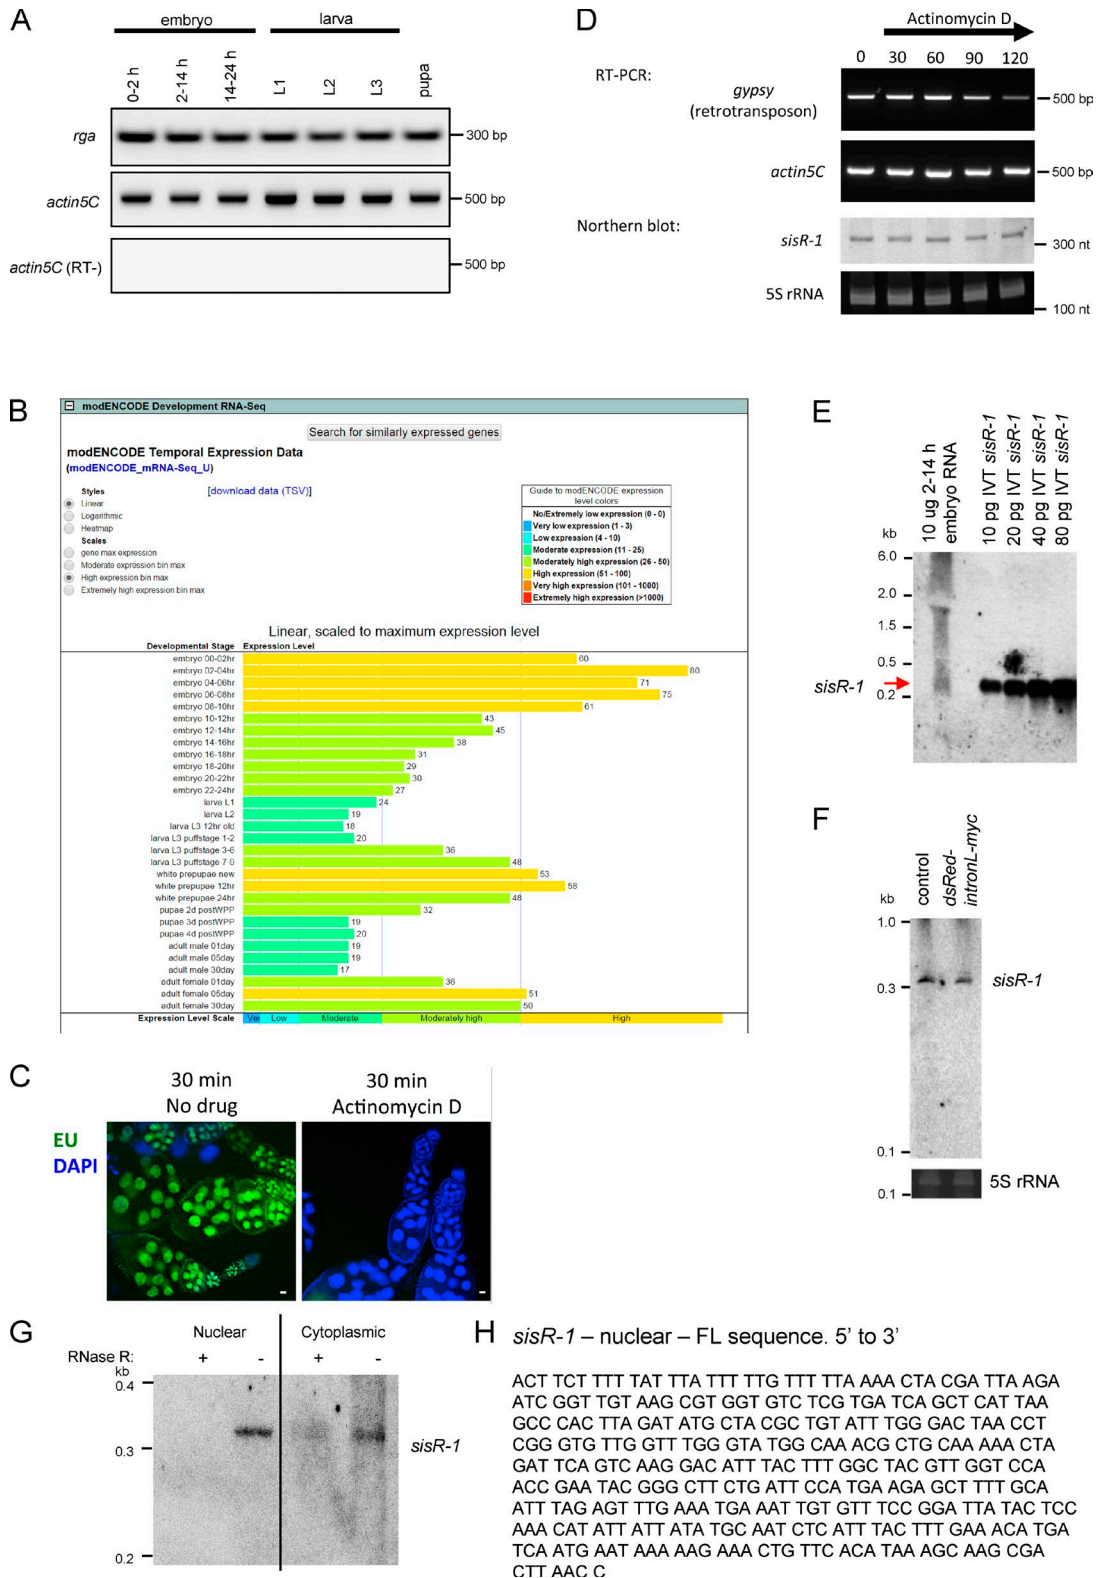

Figure S2. **Characterization of *sisR-1*.** (A) RT-PCR showing the expression of *rga* mRNA during development. *Actin5C* was used as a loading control. (B) Screen shot of the *rga* expression profile by modENCODE shown on FlyBase. (C) Actinomycin D effectively inhibits transcription in *Drosophila* ovarioles. (left) Control ovarioles incubated in ethynyluridine for 30 min show newly transcribed RNA (green). (right) Ovarioles incubated in the presence of actinomycin D fail to incorporate the RNA precursor. Ovarioles were stained with DAPI (blue) to visualize DNA. (D) RT-PCR and Northern blots showing the steady-state abundance of *gypsy* mRNA, *actin5C* mRNA, *sisR-1*, and 5S rRNA before and after actinomycin D treatment. (E) Northern blot showing the relative expression of *sisR-1* versus lariats versus pre-mRNA in 2–14-h embryos. IVT *sisR-1* was used as standards. (F) Northern blot showing the expression of *sisR-1* in controls (*y w*) versus *UAS-dsRed-intron-L-myc* females. (G) Northern blots showing the presence of *sisR-1* before and after RNase R treatment. Both nuclear and cytoplasmic *sisR-1* were degraded by RNase R, indicating that they are not circular molecules. (H) Full-length sequence of nuclear *sisR-1*.

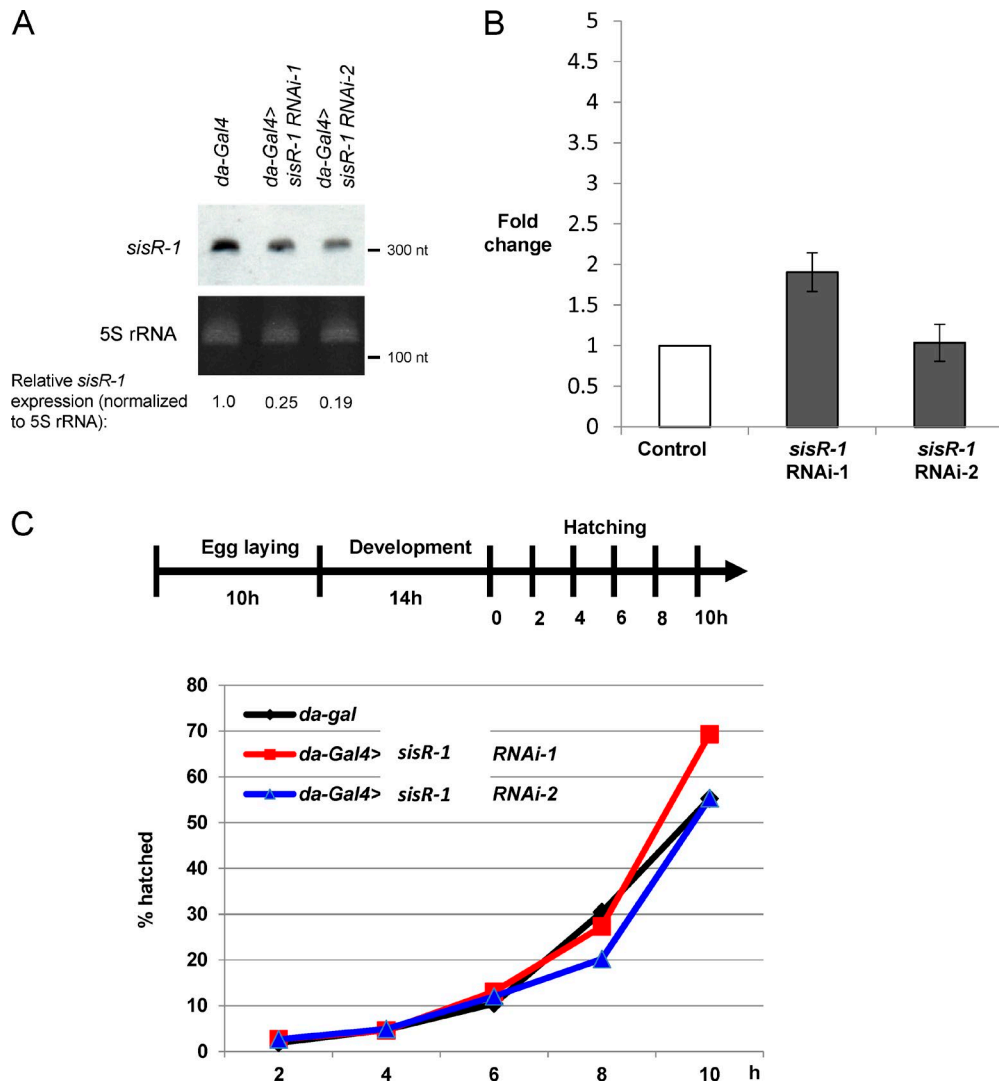

Figure S3. **shRNA-mediated knockdown of *sisR-1*.** (A) Northern blots showing the expression of *sisR-1* in controls versus ovaries expressing two independent *sisR-1* shRNAs. (B) qPCR data showing relative expression of *rga* pre-mRNA normalized to *actin5C* in controls versus ovaries expressing two independent *sisR-1* shRNAs. (C) Chart showing hatching rates of controls and shRNA-expressing embryos. Crosses were setup and allowed to lay eggs for 10 h and then develop for another 14 h. The number of hatched embryos were counted ever 2 h for a total of 10 h.

Table S1. List of candidate *sisRNAs* in 0–2-h embryos

| No. | Chromosome | Host gene             | CG number | Coordinates of the approximate center of <i>sisRNAs</i> | Location | RT-PCR in eggs |
|-----|------------|-----------------------|-----------|---------------------------------------------------------|----------|----------------|
| 1   | X          | Act5C                 | CG4027    | chrX:5,796,367                                          | 5'UTR    | N              |
| 2   | X          | PPP4R2r               | CG2890    | chrX:10,373,299                                         | 5'UTR    | Y              |
| s3  | X          | l(1)G0136             | CG8198    | chrX:15,628,779                                         | CDS      | Y              |
| 4   | X          | mbt                   | CG18582   | chrX:16,506,899                                         | CDS      | Y              |
| 5   | 2L         | toc                   | CG9660    | chr2L:3,071,980                                         | 5'UTR    | N              |
| 6   | 2L         | cl                    | CG11024   | chr2L:5,520,836                                         | CDS      | Y              |
| 7   | 2L         | Df31                  | CG2207    | chr2L:21,628,530                                        | CDS      | Y              |
| 8   | 2L         | Df31                  | CG2207    | chr2L:21,628,988                                        | CDS      | Y              |
| 9   | 2L         | Df31                  | CG2207    | chr2L:21,629,453                                        | CDS      | Y              |
| 10  | 2L         | RpS13                 | CG13389   | chr2L:8,364,446                                         | CDS      | Y              |
| 11  | 2L         |                       | CG33129   | chr2L:10,967,648                                        | 5'UTR    | Y              |
| 12  | 2R         | Mlf                   | CG8295    | chr2R:11,825,014                                        | CDS      | Y              |
| 13  | 2R         | Khc                   | CG7765    | chr2R:12,158,613                                        | CDS      | Y              |
| 14  | 2R         |                       | CG15083   | chr2R:14,723,144                                        | CDS      | Y              |
| 15  | 2R         | HmgD                  | CG17950   | chr2R:17,602,032                                        | 5'UTR    | Y              |
| 16  | 2R         | betaTub56D            | CG9277    | chr2R:15,338,652                                        | 5'UTR    | Y              |
| 17  | 2R         |                       | CG1399    | chr2R:3,568,133                                         | CDS      | Y              |
| 18  | 2R         | Fem-1                 | CG9025    | chr2R:16,553,821                                        | CDS      | Y              |
| 19  | 2R         | zip                   | CG15792   | chr2R:20,898,466                                        | 5'UTR    | Y              |
| 20  | 3L         | hsc70cb               | CG6603    | chr3L:14,031,059                                        | CDS      | Y              |
| 21  | 3L         | csp                   | CG6395    | chr3L:22,263,179                                        | CDS      | Y              |
| 22  | 3L         | capr                  | CG18811   | chr3L:18,665,583                                        | CDS      | Y              |
| 23  | 3L         | Mkrm1                 | CG7184    | chr3L:21,526,468                                        | 5'UTR    | N              |
| 24  | 3L         |                       | CG11008   | chr3L:12,808,197                                        | CDS      | Y              |
| 25  | 3L         |                       | CG33217   | chr3L:23,123,899                                        | CDS      | Y              |
| 26  | 3R         | rga ( <i>sisR-1</i> ) | CG2161    | chr3R:1,435,140                                         | CDS      | Y              |
| 27  | 3R         |                       | CG8301    | chr3R:5,410,682                                         | CDS      | Y              |
| 28  | 3R         | desat1                | CG5887    | chr3R:8,268,685                                         | 5'UTR    | Y              |
| 29  | 3R         |                       | CG9795    | chr3R:145,807                                           | 5'UTR    | Y              |
| 30  | 3R         | RpL35A                | CG2099    | chr3R:1,292,496                                         | 5'UTR    | Y              |
| 31  | 3R         | RpS27                 | CG10423   | chr3R:21,072,909                                        | 5'UTR    | Y              |
| 32  | 3R         |                       | CG12054   | chr3R:27,047,539                                        | CDS      | Y              |
| 33  | 4          | eIF4G                 | CG10811   | chr4:945,544                                            | CDS      | Y              |
| 34  | 4          | CaMKII                | CG18069   | chr4:1,061,498                                          | CDS      | Y              |

*sisRNAs* verified by Northern blots *mbt*, *csp*, *rga*, and *RpS27*. N, no; Y, yes.

Table S2. List of oligonucleotides used in the study

| Oligos                                                               | Sequence (5'-3')                                                                                   |
|----------------------------------------------------------------------|----------------------------------------------------------------------------------------------------|
| rga Northern probe Fw (intron)                                       | TGAACAGTTTCTTTTATTATTGAT                                                                           |
| rga Northern probe Rv (intron)                                       | GAATCGTTGTAAGCGTGGT                                                                                |
| rga exon Fw                                                          | ACTGCCACCAGTCCTACAT                                                                                |
| rga exon Rv                                                          | GCCGATGAATTCGATAGTGG                                                                               |
| rga 5' race nested                                                   | AAAAGCTTTCATGGAATCA                                                                                |
| rga 3' Race nested                                                   | TCTCGTGATCAGCTCATTAAAG                                                                             |
| rga intron A Ascl Fw                                                 | CGATGCGGCGGCCAGGTGAGTTCAAATCA<br>AAATCC                                                            |
| rga intron B Ascl Fw                                                 | CGATGCGGCGGCCAGGTAAATTTCTTTACCTCT<br>TGT                                                           |
| rga intron NotI Rv                                                   | TAGCATGCGGCCGCATCTGAAATCAGAAGAGGA<br>GCC                                                           |
| rga intron second half probe Fw (also for ASTR, and rga pre-mRNA Fw) | CAGAAGAGGAGCGAGATGGT                                                                               |
| rga intron second half probe Rv (also for ASTR)                      | AAAGCAAGCGACTTAACCTTTT                                                                             |
| Sis-rga-shRNA-1-top-oligo                                            | CGATGCGCTAGCAGTAGCCACTTAGATATGCT<br>ACGTAGTTATATTCAAGCATACTAGCATATA<br>TCTAAGTGGGCTGCGAATTCATGCTA  |
| Sis-rga-shRNA-1-bottom-oligo                                         | TAGCATGAATTCGCAGCCCACTTAGATATGCTA<br>CGTATGCTTGAATATAACTACGTAGCATAT<br>CTAAGTGGGCTACTGCTAGCGCATCG  |
| Sis-rga-shRNA-2-top-oligo                                            | CGATGCGCTAGCAGTAGCTTGGTCCAACCGAAT<br>ACGTAGTTATATTCAAGCATACTAGTTCCGG<br>TTGGACCAACGTGCGAATTCATGCTA |
| Sis-rga-shRNA-2-bottom-oligo                                         | TAGCATGAATTCGCAGCTTGGTCCAACCGAATA<br>CGTATGCTTGAATATAACTACGTATTCGGT<br>TGGACCAACGTACTGCTAGCGCATCG  |
| rga sisRNA nuclear 3' extreme end                                    | GGTTAAGTCGCTTGCTTTATGTG                                                                            |
| rga sisRNA cyto predicted 3' extreme end                             | TTCTTTTATTATTGATCATGTTTCA                                                                          |
| actin5C-Fw                                                           | TGCCCATCTACGAGGGTTAT                                                                               |
| actin5C-Rv                                                           | AGTACTTGGCCTCTGGCGG                                                                                |
| gypsy Fw DE-1                                                        | GCCTTAAAGGTTGTGGCGGG                                                                               |
| gypsy Rv DE-2                                                        | GGGTAGACGGCGACTTTCTTGC                                                                             |
| dsRed Fw                                                             | AGTTTATGCGCTTCAAGGTG                                                                               |
| dsRed Rv                                                             | TTCACGCCGATGAACTTCAC                                                                               |
| rga mRNA Fw                                                          | CCGTCCAAGTGGTTCTCTGT                                                                               |
| rga mRNA Rv (also for rga pre-mRNA Rv)                               | TGGCGGTCTTTGAATAACT                                                                                |
| rga intron A 5' ss mut Ascl Fw                                       | CGATGCGGCGGCCAGCTGAGTTCAAATCAAAA<br>TCC                                                            |
| Act5C sisRNA Fw                                                      | TTTGCGGCTTTCTTTGCAC                                                                                |
| Act5C sisRNA Rv                                                      | TACAAAATAGAAGGCCCGC                                                                                |
| PPP4R2r sisRNA Fw                                                    | AGAAAATGTGTGCTTGTGTGC                                                                              |
| PPP4R2r sisRNA Rv                                                    | CAATTGTGTGCAGGTAGGTATG                                                                             |
| I(1)G0136 sisRNA Fw                                                  | GCATTCTATCGCCTTCCACG                                                                               |
| I(1)G0136 sisRNA Rv                                                  | GCCCTCTTGCGAACCTTCTA                                                                               |
| mbt sisRNA Fw                                                        | TTGTGCCTTTGTACCTTGCC                                                                               |
| mbt sisRNA Rv                                                        | ATTTACCTGGCACTTTGGG                                                                                |
| toc sisRNA Fw                                                        | TTGGATCTCGAGAGTTTGCG                                                                               |
| toc sisRNA Rv                                                        | GGATTTTCCCGGCAACCTTT                                                                               |
| cl sisRNA Fw                                                         | GAGACTGCGAACATCTGCTG                                                                               |
| cl sisRNA Rv                                                         | ACAGTTGGGGTTGAGTGACT                                                                               |
| Df31-1 sisRNA Fw                                                     | TGCATTGTTACATCTGCCGG                                                                               |
| Df31-1 sisRNA Rv                                                     | ACCCTGTTCTCATCTGTTGGT                                                                              |
| Df31-2 sisRNA Fw                                                     | AGTCGTTTCTCTCGCACTCA                                                                               |
| Df31-2 sisRNA Rv                                                     | AAGACCGCAGTTGTATGACG                                                                               |
| Df31-3 sisRNA Fw                                                     | GTCGTCGGCATACTCAAC                                                                                 |
| Df31-3 sisRNA Rv                                                     | TGTAGTTGTCCTGTTCCCGC                                                                               |

Table S2. List of oligonucleotides used in the study (Continued)

| Oligos                      | Sequence (5'-3')         |
|-----------------------------|--------------------------|
| RpS13 <i>sisRNA</i> Fw      | GCGCCTGTCAAATGCGAATA     |
| RpS13 <i>sisRNA</i> Rv      | CCTGTGTGCCAAGCTGAATG     |
| CG33129 <i>sisRNA</i> Fw    | AATCGCAGCTGGAACACATC     |
| CG33129 <i>sisRNA</i> Rv    | GGTTCAGTTGCCGCTAAAT      |
| Mlf <i>sisRNA</i> Fw        | CGTTGCTACCCATGAAGTCG     |
| Mlf <i>sisRNA</i> Rv        | TGTCAGCTTCGAACCTCATT     |
| Khc <i>sisRNA</i> Fw        | GTCCATCGCGCTTCTTTCGAT    |
| Khc <i>sisRNA</i> Rv        | CTTCCCCAAAATTGCCGACC     |
| CG15083 <i>sisRNA</i> Fw    | ATTGCCCAGACTGACGCTAT     |
| CG15083 <i>sisRNA</i> Rv    | TGAATTGTCAAGCTCGAATTTGTC |
| HmgD <i>sisRNA</i> Fw       | AGGCAGTCATCGCATAACAGA    |
| HmgD <i>sisRNA</i> Rv       | ACGCGCGCCACTTAATAATT     |
| betaTub56D <i>sisRNA</i> Fw | TATGCGAATGTCAATGGCCC     |
| betaTub56D <i>sisRNA</i> Rv | TCCCGGCATCTGTGTTTGTA     |
| CG1399 <i>sisRNA</i> Fw     | TAGTATGTTGGGACGTTTGTGA   |
| CG1399 <i>sisRNA</i> Rv     | ACTGAACACTTATCCATACCCA   |
| Fem-1 <i>sisRNA</i> Fw      | TAAAACGCAACAGCAGAGGT     |
| Fem-1 <i>sisRNA</i> Rv      | CACCAAAAAGTCACTGTGCGCA   |
| zip <i>sisRNA</i> Fw        | CTTTATCTCGGAAGTGGCGC     |
| zip <i>sisRNA</i> Rv        | CACCACCCCTTCTTCTACGT     |
| hsc70cb <i>sisRNA</i> Fw    | CGGTCTGCATAATCGTTCGA     |
| hsc70cb <i>sisRNA</i> Rv    | GCACATATCTGGGTACACG      |
| csp <i>sisRNA</i> Fw        | GTCCAAATATAATACCCGCCCC   |
| csp <i>sisRNA</i> Rv        | AGTACAGTGTGTGGGTGGAT     |
| capr <i>sisRNA</i> Fw       | ACTGTTCTAATTGACATGCCG    |
| capr <i>sisRNA</i> Rv       | TCCTCCGTGTGCTTTGTTT      |
| Mkrn1 <i>sisRNA</i> Fw      | CCCCAAACGAACATACCTACAG   |
| Mkrn1 <i>sisRNA</i> Rv      | TGCAAAAGGTGTACAGAGTG     |
| CG11008 <i>sisRNA</i> Fw    | AAACCGTTACAAACCCAGGG     |
| CG11008 <i>sisRNA</i> Rv    | CGAAAAGAAAGTGAAGGCGC     |
| CG33217 <i>sisRNA</i> Fw    | TCGGGGTATAAAGTGATGTCACT  |
| CG33217 <i>sisRNA</i> Rv    | TCACTCGAGCCAGGATTGTT     |
| rga <i>sisRNA</i> Fw        | TCATGGAATCAGAAGCCCGT     |
| rga <i>sisRNA</i> Rv        | GGTTGTAAGCGTGGTGTCTC     |
| CG8301 <i>sisRNA</i> Fw     | AAGAATCCCTGGAGAGCAGC     |
| CG8301 <i>sisRNA</i> Rv     | AACGGATGGCTAGTCGTAGA     |
| desat1 <i>sisRNA</i> Fw     | GTGATAACGGGCCACAACAA     |
| desat1 <i>sisRNA</i> Rv     | ATCAGAGGCACGCATTGAAC     |
| CG9795 <i>sisRNA</i> Fw     | GGAGCTAGCAGGAGGAAGAA     |
| CG9795 <i>sisRNA</i> Rv     | AAGTTTTGACACCGCTCAA      |
| RpL35A <i>sisRNA</i> Fw     | CATGGAACCTTTTGACGGCA     |
| RpL35A <i>sisRNA</i> Rv     | ATAACCTGCAAACGCCAACC     |
| RpS27 <i>sisRNA</i> Fw      | TGGCACATTTTCTCTCGGTG     |
| RpS27 <i>sisRNA</i> Rv      | CCCGTTCCATTGAATGTGT      |
| CG12054 <i>sisRNA</i> Fw    | CTGGAATGGCTACCTGTGC      |
| CG12054 <i>sisRNA</i> Rv    | CCACTACCCGCAACAACA       |
| eIF4G <i>sisRNA</i> Fw      | ACCCGAAATTTGAAGTCGAGAC   |
| eIF4G <i>sisRNA</i> Rv      | GGCTCTGATTCTGCGCAAAT     |
| CaMKII <i>sisRNA</i> Fw     | TGTCGTCAAGGTACCGTAACA    |
| CaMKII <i>sisRNA</i> Rv     | CGTAAGGGGAGAGTGACACA     |
